1 **Title: Functional consequences of genetic loci associated with intelligence in a**  
2 **meta-analysis of 87,740 individuals**

3

4 Jonathan R. I. Coleman<sup>1,2</sup>, Julien Bryois<sup>3</sup>, H el ena A. Gaspar<sup>1</sup>, Philip R. Jansen<sup>4,5</sup>,  
5 Jeanne Savage<sup>4</sup>, Nathan Skene<sup>6</sup>, Robert Plomin<sup>1</sup>, Ana B. Mu oz-Manchado<sup>6</sup>, Sten  
6 Linnarsson<sup>6</sup>, Greg Crawford<sup>7,8</sup>, Jens Hjerling-Leffler<sup>6</sup>, Patrick F. Sullivan<sup>3,9</sup>, Danielle  
7 Posthuma<sup>4,10,¶,\*</sup>, Gerome Breen<sup>1,2,¶,\*</sup>

8

9 Author Affiliations:

10 <sup>1</sup> MRC Social, Genetic and Developmental Psychiatry Centre, Institute of Psychiatry,  
11 Psychology & Neuroscience, King's College London, London SE5 8AF, UK.

12 <sup>2</sup> NIHR Biomedical Research Centre for Mental Health, South London and Maudsley  
13 NHS Trust, London SE5 8AF, UK.

14 <sup>3</sup> Department of Medical Epidemiology and Biostatistics, Karolinska Institutet, SE-  
15 17177 Stockholm, Sweden.

16 <sup>4</sup> Department of Complex Trait Genetics, VU University, Center for Neurogenomics  
17 and Cognitive Research, Amsterdam, 1081 HV, The Netherlands.

18 <sup>5</sup> Department of Child and Adolescent Psychiatry, Erasmus University Medical  
19 Center, Rotterdam, the Netherlands

20 <sup>6</sup> Laboratory of Molecular Neurobiology, Department of Medical Biochemistry and  
21 Biophysics, Karolinska Institutet, SE-17177 Stockholm, Sweden.

22 <sup>7</sup> Center for Genomic and Computational Biology, Duke University, Durham, NC  
23 27708, USA

24 <sup>8</sup> Department of Pediatrics, Medical Genetics Division, Duke University, Durham, NC  
25 27708, USA

26 <sup>9</sup> Departments of Genetics, University of North Carolina, Chapel Hill, NC, 27599-  
27 7264, USA.

28 <sup>10</sup> Department of Clinical Genetics, VU University Medical Center (VUMC),  
29 Neuroscience Campus Amsterdam, Amsterdam, 1081 HV, The Netherlands.

30 ¶ These authors contributed equally to the work

31 \* Correspondence to: [gerome.breen@kcl.ac.uk](mailto:gerome.breen@kcl.ac.uk) or [danielle.posthuma@vu.nl](mailto:danielle.posthuma@vu.nl)

32

33 Running title: Secondary analysis of IQ GWAS

34

35 Conflict of Interest Statement

36 PF Sullivan reports the following potentially competing financial interests: Lundbeck  
37 (advisory committee), Pfizer (Scientific Advisory Board member), and Roche (grant  
38 recipient, speaker reimbursement). G Breen reports consultancy and speaker fees

39 from Eli Lilly and Illumina and grant funding from Eli Lilly. All other authors declare no  
40 financial interests or potential conflicts of interest.

41

42

43 Abstract

44

45 Variance in IQ is associated with a wide range of health outcomes, and 1% of the  
46 population are affected by intellectual disability. Despite a century of research, the  
47 fundamental neural underpinnings of intelligence remain unclear. We integrate  
48 results from genome-wide association studies (GWAS) of intelligence with brain  
49 tissue and single cell gene expression data to identify tissues and cell types  
50 associated with intelligence. GWAS data for IQ (N = 78,308) were meta-analyzed  
51 with an extreme-trait cohort of 1,247 individuals with mean IQ ~170 and 8,185  
52 controls. Genes associated with intelligence implicate pyramidal neurons of the  
53 somatosensory cortex and CA1 region of the hippocampus, and midbrain embryonic  
54 GABAergic neurons. Tissue-specific analyses find the most significant enrichment  
55 for frontal cortex brain expressed genes. These results suggest specific neuronal cell  
56 types and genes may be involved in intelligence and provide new hypotheses for  
57 neuroscience experiments using model systems.

58 Genome-wide association studies (GWAS) have successfully identified  
59 statistical associations with a wide range of behavioral phenotypes and  
60 neuropsychiatric disorders<sup>1-3</sup>. Increasing sample sizes has begun to yield findings  
61 for intelligence<sup>4-6</sup>. The largest and most recent study of intelligence reported 18 loci  
62 significantly associated with intelligence<sup>4</sup>. Significant genetic correlations were  
63 observed between intelligence and a variety of behavioral (educational attainment,  
64 smoking behaviors), anthropometric (cranial morphology, height, body composition),  
65 and psychiatric phenotypes (schizophrenia, autism, depressive symptoms), mirroring  
66 epidemiological evidence for correlations between intelligence and a broad range of  
67 health-related outcomes<sup>4,7</sup>.

68 Considered alone, not all associations identified by GWAS precisely localize  
69 biological mechanisms amenable to subsequent experimentation. For instance, the  
70 most associated variant in a significant locus may not be the causal variant<sup>8,9</sup>, there  
71 may be multiple causal variants in a locus<sup>10</sup>, loci may act through altering the  
72 expression of distant genes<sup>11</sup>, and the associations identified by GWAS of complex  
73 traits are often spread across the genome<sup>12-14</sup>. To extract meaningful biological  
74 inferences from GWAS results, it is necessary to integrate data from other sources,  
75 such as studies of gene expression<sup>15</sup>. Results from gene-wise analyses in Sniekers  
76 et al. (2017) identified expression predominant in the brain for 14 of the 44 genes  
77 with significant association, although some transcription was inferred for most genes  
78 across most tissues<sup>4</sup>. Integration of genomic results with data on biological  
79 pathways suggested a prominent role for nervous system development in  
80 intelligence.

81 *In silico* functional annotation of GWAS results is dependent on high-quality  
82 biological reference data. Recently, data from the Karolinska Institutet (KI) mouse

83 superset of single-cell RNA sequencing (scRNAseq) of ~10,000 single cells from  
84 multiple brain regions was used to map schizophrenia GWAS results to brain cell  
85 types <sup>16</sup>. Genes that previously showed association with schizophrenia were  
86 expressed with higher specificity in pyramidal cells, medium spiny neurons, and  
87 interneurons than in 20 other brain cell types. This demonstrates the potential of cell-  
88 type specific annotation to enable the construction of new functional hypotheses for  
89 complex traits.

90         We sought to develop a better understanding of the neurobiological  
91 underpinnings of intelligence through combining GWAS results with a number of  
92 data sources concerned with tissue and cell-type specific gene expression. To this  
93 end, we meta-analyzed the most recent GWAS of intelligence <sup>4</sup> with an extreme-trait  
94 GWAS that compared individuals of very high intelligence to a group from the  
95 general population (HiQ) <sup>17</sup>. We then analyzed the enrichment of associations with  
96 intelligence in single cell expression data from the KI mouse superset <sup>16</sup>, and in brain  
97 genomic and transcriptomic data from the GTEx project <sup>18</sup>. Finally, we combined  
98 genomic and tissue-specific expression data with information from biological,  
99 disease-relevant and drug-target pathway databases to further assess the potential  
100 impact of biological mechanisms explaining variance in intelligence.

101

## 102 Results

103

### 104 ***Meta-analysis***

105         The genetic correlation between Sniekers et al. (2017) and HiQ was 0.92 (SE:  
106 0.07) and was sufficiently high to justify meta-analysis. 25 loci met genome-wide  
107 significance with intelligence (i.e.,  $p < 5 \times 10^{-8}$ ; Table 1, Figure 1a). Of these, 13 were  
108 genome-wide significant in Sniekers et al. (2017) and 12 were novel (Table 1;  
109 Supplementary Table 1). The single locus previously identified in the HiQ sample  
110 was not genome-wide significant in this analysis ( $p = 0.00595$ ; <sup>17</sup>).

111         Assessment of genome-wide inflation yielded a median  $\lambda_{GC}$  of 1.24. The LD  
112 score regression intercept from was 1.004 (SE: 0.01), suggesting that this inflation is  
113 caused by polygenicity rather than confounding (Figure 1b) <sup>19</sup>. Annotation of specific  
114 genomic loci to databases of interest suggested overlapping loci between  
115 intelligence and a variety of phenotypes (Supplementary Table 2). The largest  
116 overlap was observed with educational attainment (14/25 loci), but overlap at  
117 multiple loci was widespread, including with age at menarche, height, body mass  
118 index, autoimmune disease, and schizophrenia. Genes previously implicated in  
119 intellectual disability or developmental delay (ID/DD) were present within 9/25 loci.

120

### 121 ***Heritability and partitioned heritability***

122         LD Score regression yielded a SNP-heritability estimate of 0.221 (SE: 0.01) in  
123 line with the previously reported SNP-heritability in Sniekers et al (2017). Partitioning  
124 this heritability across 58 functional SNP annotations identifies conserved regions as  
125 significantly enriched contributors to the heritability of intelligence (proportion of  
126 heritability = 0.340, enrichment = 13.3 fold,  $p = 3.26 \times 10^{-8}$ ), consistent with previous

| Locus     | Chr       | Locus BP                   | Index SNP         | Pos              | A1       | A2       | Dir       | FreqA1       | Zscore       | p                            |
|-----------|-----------|----------------------------|-------------------|------------------|----------|----------|-----------|--------------|--------------|------------------------------|
| 1         | 1         | 22354246-22470115          | rs7526484         | 22451845         | T        | C        | ++        | 0.257        | 5.46         | 4.82x10 <sup>-8</sup>        |
| <b>2</b>  | <b>1</b>  | <b>41748897-41850182</b>   | <b>rs12744310</b> | <b>41773502</b>  | <b>T</b> | <b>C</b> | <b>--</b> | <b>0.208</b> | <b>-5.51</b> | <b>3.63x10<sup>-8</sup></b>  |
| 3         | 1         | 98149785-98660622          | rs72737821        | 98581337         | A        | T        | ++        | 0.712        | 5.48         | 4.37x10 <sup>-8</sup>        |
| 4         | 1         | 103548734-103703521        | rs6577362         | 103632361        | A        | G        | --        | 0.666        | -5.77        | 8.05x10 <sup>-9</sup>        |
| <b>5</b>  | <b>2</b>  | <b>71434829-71701353</b>   | <b>rs6745907</b>  | <b>71609073</b>  | <b>A</b> | <b>G</b> | <b>--</b> | <b>0.433</b> | <b>-5.82</b> | <b>5.78x10<sup>-9</sup></b>  |
| <b>6</b>  | <b>2</b>  | <b>100576304-101031561</b> | <b>rs13010010</b> | <b>100852734</b> | <b>T</b> | <b>C</b> | <b>++</b> | <b>0.390</b> | <b>6.57</b>  | <b>5.09x10<sup>-11</sup></b> |
| <b>7</b>  | <b>2</b>  | <b>144152539-144272229</b> | <b>rs13428598</b> | <b>144250487</b> | <b>T</b> | <b>C</b> | <b>++</b> | <b>0.375</b> | <b>5.85</b>  | <b>4.95x10<sup>-9</sup></b>  |
| 8         | 2         | 161903399-162071338        | rs10930013        | 162070325        | A        | G        | --        | 0.475        | -5.55        | 2.87x10 <sup>-8</sup>        |
| 9         | 2         | 217286343-217397419        | rs13411858        | 217306698        | T        | G        | --        | 0.843        | -5.57        | 2.60x10 <sup>-8</sup>        |
| <b>10</b> | <b>3</b>  | <b>23839884-24207650</b>   | <b>rs7646501</b>  | <b>24079291</b>  | <b>A</b> | <b>G</b> | <b>++</b> | <b>0.749</b> | <b>6.67</b>  | <b>2.62x10<sup>-11</sup></b> |
| 11        | 3         | 49381898-50247824          | rs1987628         | 49399259         | A        | G        | ++        | 0.319        | 5.49         | 4.01x10 <sup>-8</sup>        |
| 12        | 4         | 106066982-106316427        | rs2647257         | 106199505        | A        | T        | ++        | 0.636        | 5.54         | 2.98x10 <sup>-8</sup>        |
| 13        | 5         | 176855627-176898619        | rs2545797         | 176864202        | T        | C        | ++        | 0.455        | 5.53         | 3.12x10 <sup>-8</sup>        |
| <b>14</b> | <b>6</b>  | <b>98310291-98591810</b>   | <b>rs12206087</b> | <b>98582900</b>  | <b>A</b> | <b>G</b> | <b>++</b> | <b>0.504</b> | <b>6.8</b>   | <b>1.05x10<sup>-11</sup></b> |
| <b>15</b> | <b>6</b>  | <b>108856378-109020032</b> | <b>rs768023</b>   | <b>108876002</b> | <b>A</b> | <b>G</b> | <b>++</b> | <b>0.564</b> | <b>7.2</b>   | <b>5.84x10<sup>-13</sup></b> |
| <b>16</b> | <b>7</b>  | <b>32209459-32399658</b>   | <b>rs10236197</b> | <b>32291761</b>  | <b>T</b> | <b>C</b> | <b>++</b> | <b>0.654</b> | <b>6.03</b>  | <b>1.61x10<sup>-9</sup></b>  |
| <b>17</b> | <b>7</b>  | <b>32472099-32831680</b>   | <b>rs6949851</b>  | <b>32493807</b>  | <b>T</b> | <b>G</b> | <b>++</b> | <b>0.675</b> | <b>5.45</b>  | <b>4.97x10<sup>-8</sup></b>  |
| <b>18</b> | <b>7</b>  | <b>133130940-133727497</b> | <b>rs4728302</b>  | <b>133630463</b> | <b>T</b> | <b>C</b> | <b>--</b> | <b>0.582</b> | <b>-5.66</b> | <b>1.48x10<sup>-8</sup></b>  |
| 19        | 9         | 23344737-23407386          | rs11794152        | 23345347         | A        | G        | --        | 0.589        | -6.23        | 4.72x10 <sup>-10</sup>       |
| <b>20</b> | <b>9</b>  | <b>72014104-72213799</b>   | <b>rs11138902</b> | <b>72103314</b>  | <b>A</b> | <b>G</b> | <b>++</b> | <b>0.537</b> | <b>6.02</b>  | <b>1.77x10<sup>-9</sup></b>  |
| <b>21</b> | <b>13</b> | <b>106580722-106688603</b> | <b>rs2251499</b>  | <b>106639856</b> | <b>T</b> | <b>C</b> | <b>++</b> | <b>0.250</b> | <b>6.85</b>  | <b>7.60x10<sup>-12</sup></b> |
| 22        | 14        | 103987140-104018455        | rs10149470        | 104017953        | A        | G        | --        | 0.486        | -5.49        | 4.04x10 <sup>-8</sup>        |
| <b>23</b> | <b>16</b> | <b>28490517-28917746</b>   | <b>rs12928404</b> | <b>28847246</b>  | <b>T</b> | <b>C</b> | <b>++</b> | <b>0.663</b> | <b>5.59</b>  | <b>2.26x10<sup>-8</sup></b>  |
| <b>24</b> | <b>20</b> | <b>47413079-47938626</b>   | <b>rs6095360</b>  | <b>47532536</b>  | <b>A</b> | <b>G</b> | <b>--</b> | <b>0.693</b> | <b>-6.16</b> | <b>7.26x10<sup>-10</sup></b> |
| 25        | 22        | 51089716-51151631          | rs5770820         | 51150473         | A        | G        | --        | 0.209        | -5.63        | 1.82x10 <sup>-8</sup>        |

127 Table 1: Genome-wide significant variants from single-variant association analyses.

128 Loci significant in Sniekers et al. (2017) are in bold.

129 FreqA1 = A1 frequency in non-Finnish samples from the 1000 Genomes project.

130 Dir = direction of effect in Sniekers and in TIP.

131

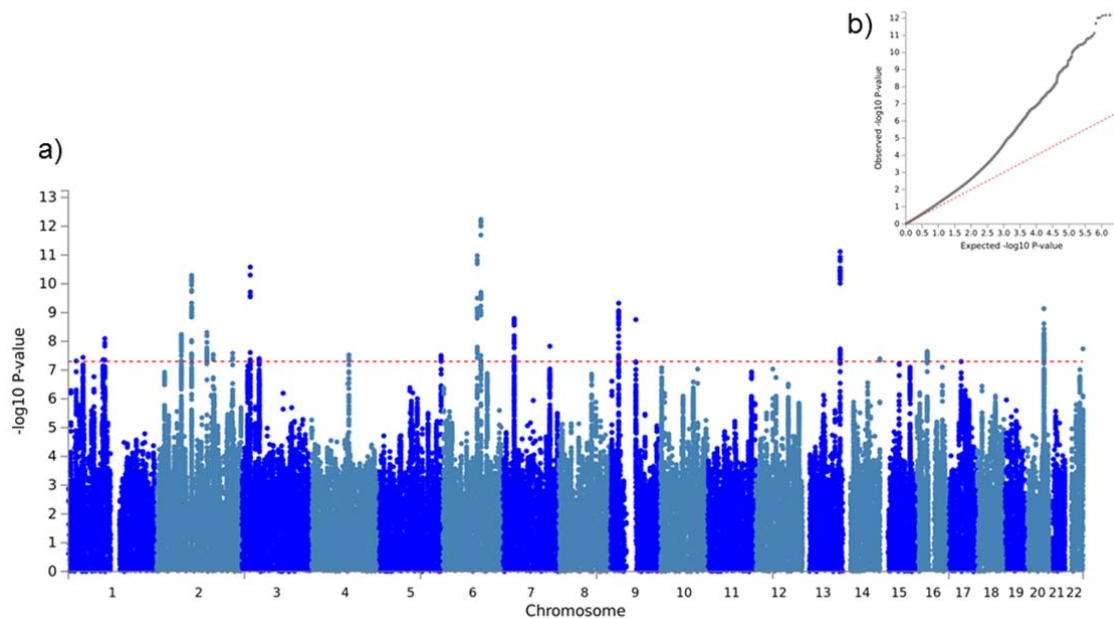

132

133

134

Figure 1: a) Manhattan plot and b) QQ plot of meta-analysis results

135

136 reports in a subset of our meta-analyzed cohorts<sup>20</sup>. Four extended annotations were

137 also significantly enriched ( $p < 8.62 \times 10^{-4}$ ; Figure 2), suggesting that genetic

138 variation located in the vicinity of conserved regions, enhancers (specifically

139 H3K4me1 elements) and open chromatin in brain dorsolateral prefrontal cortex<sup>21</sup>

140 and fetal cells) are enriched in heritability for intelligence.

141

### 142 **Gene-wise analyses**

143 93 genes at 41 loci were identified at genome-wide significance ( $p < 2.65 \times$

144  $10^{-6}$ , Bonferroni threshold for 18,839 genes; Table 2, Supplementary Figure 1). 28 of

145 these genes (20 loci) were also identified in Sniekers et al. (2017). 11 of the 93

146 genes were previously implicated in intellectual disability or developmental delay,

147 although this overlap does not significantly from what is expected under the null

148 hypothesis of no enrichment ( $p = 0.073$ , hypergeometric test; Table 2).

149

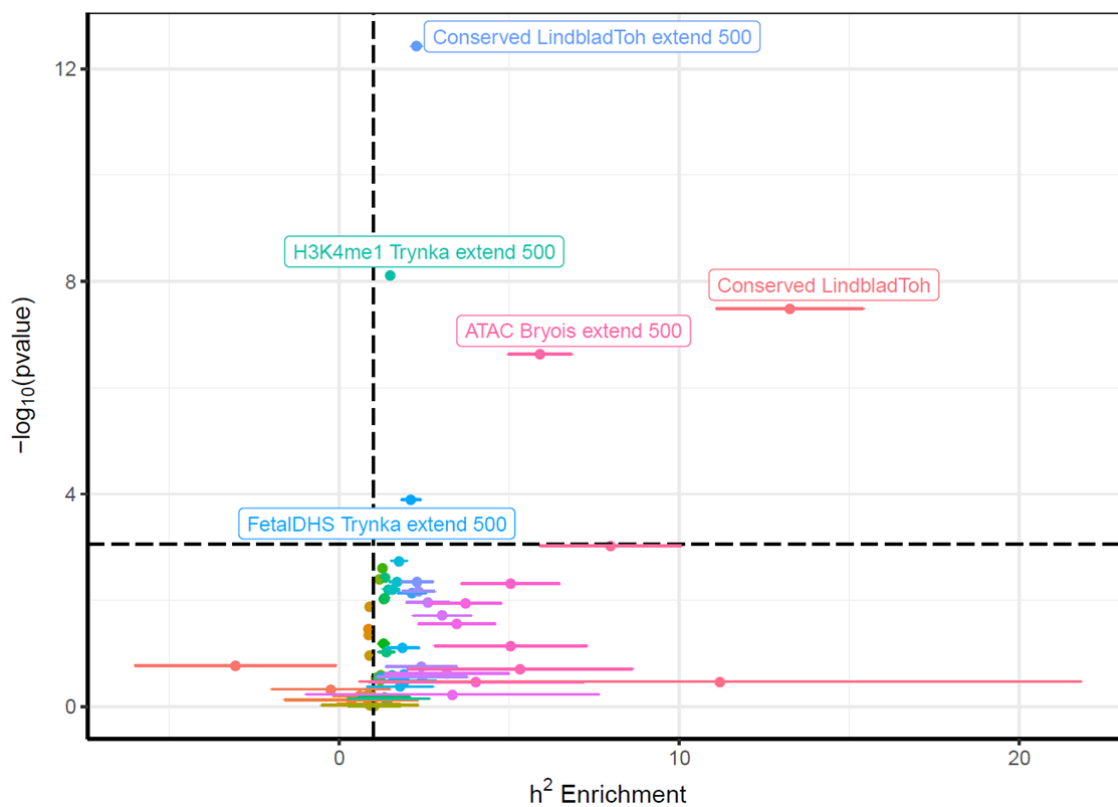

150

151

152 Figure 2: Heritability enrichment of genomic annotations. Horizontal line is  $p =$

153  $8.62 \times 10^{-4}$ , Bonferroni-corrected threshold for 58 annotations. Vertical line is

154 enrichment = 1 (that is, no enrichment)



| Locus               | Gene Names                                                                                                                                                                                                                                                       | Chr | Pos                        | SNPS                                                                                                                                                                   | P                                                                                                                                                                                                                                                                                                                                                                                                                                                                                                                                                                                                                                                         |
|---------------------|------------------------------------------------------------------------------------------------------------------------------------------------------------------------------------------------------------------------------------------------------------------|-----|----------------------------|------------------------------------------------------------------------------------------------------------------------------------------------------------------------|-----------------------------------------------------------------------------------------------------------------------------------------------------------------------------------------------------------------------------------------------------------------------------------------------------------------------------------------------------------------------------------------------------------------------------------------------------------------------------------------------------------------------------------------------------------------------------------------------------------------------------------------------------------|
| 1                   | CDC42<br><b>WNT4</b>                                                                                                                                                                                                                                             | 1   | <b>22347138-2479067</b>    | 188<br><b>197</b>                                                                                                                                                      | 5.32x10 <sup>-7</sup><br><b>6.33x10<sup>-7</sup></b>                                                                                                                                                                                                                                                                                                                                                                                                                                                                                                                                                                                                      |
| 2                   | FOXO6                                                                                                                                                                                                                                                            | 1   | 41431939-41830086          | 130                                                                                                                                                                    | 1.86x10 <sup>-8</sup>                                                                                                                                                                                                                                                                                                                                                                                                                                                                                                                                                                                                                                     |
| Chr1:71.8-72.8 Mb   | NEGR1                                                                                                                                                                                                                                                            | 1   | 71861623-72748417          | 1424                                                                                                                                                                   | 1.09x10 <sup>-6</sup>                                                                                                                                                                                                                                                                                                                                                                                                                                                                                                                                                                                                                                     |
| 4                   | COL11A1                                                                                                                                                                                                                                                          | 2   | 103403088-103773269        | 1027                                                                                                                                                                   | 4.25x10 <sup>-7</sup>                                                                                                                                                                                                                                                                                                                                                                                                                                                                                                                                                                                                                                     |
| 5                   | <b>ZNF638</b><br>DYSF                                                                                                                                                                                                                                            | 2   | <b>71381822-71702582</b>   | <b>492</b><br>621                                                                                                                                                      | <b>1.41x10<sup>-8</sup></b><br>3.48x10 <sup>-7</sup>                                                                                                                                                                                                                                                                                                                                                                                                                                                                                                                                                                                                      |
| 7                   | <b>ARHGAP15</b>                                                                                                                                                                                                                                                  | 2   | <b>144151161-144356509</b> | <b>1088</b>                                                                                                                                                            | <b>2.10x10<sup>-7</sup></b>                                                                                                                                                                                                                                                                                                                                                                                                                                                                                                                                                                                                                               |
| 8                   | DPP4                                                                                                                                                                                                                                                             | 2   | 161868668-162319725        | 100                                                                                                                                                                    | 1.25x10 <sup>-6</sup>                                                                                                                                                                                                                                                                                                                                                                                                                                                                                                                                                                                                                                     |
| Chr3:16.8-17.2 Mb   | PLCL2                                                                                                                                                                                                                                                            | 3   | 16844159-17132086          | 712                                                                                                                                                                    | 2.30x10 <sup>-9</sup>                                                                                                                                                                                                                                                                                                                                                                                                                                                                                                                                                                                                                                     |
| 10                  | <i>THRB</i><br><b>RPL15</b>                                                                                                                                                                                                                                      | 3   | <b>23961762-24190184</b>   | 818<br><b>86</b>                                                                                                                                                       | 1.12x10 <sup>-8</sup><br><b>3.04x10<sup>-7</sup></b>                                                                                                                                                                                                                                                                                                                                                                                                                                                                                                                                                                                                      |
| 11                  | TCTA<br><i>AMT</i><br>RHOA<br><i>DAG1</i><br>NICN1<br>TRAIP<br>BSN<br>GPX1 CTD-<br>2330K9.3<br>AMIGO3<br><i>GMPPB</i><br><b>IP6K1</b><br>MST1<br>MON1A<br>CAMKV<br><b>RNF123</b><br>FAM212A<br>CDHR4<br>MST1R<br>UBA7<br>RBM6<br>GNAT1<br>APEH<br>USP4<br>SEMA3F | 3   | <b>48725014-50125108</b>   | 68<br>60<br>127<br>132<br>60<br>70<br>173<br>51<br>57<br>53<br>53<br><b>116</b><br>50<br>77<br>52<br><b>72</b><br>59<br>60<br>54<br>52<br>256<br>66<br>52<br>104<br>93 | 2.03x10 <sup>-9</sup><br>8.39x10 <sup>-9</sup><br>1.88x10 <sup>-8</sup><br>3.26x10 <sup>-8</sup><br>3.78x10 <sup>-8</sup><br>3.97x10 <sup>-8</sup><br>5.25x10 <sup>-8</sup><br>5.86x10 <sup>-8</sup><br>7.08x10 <sup>-8</sup><br>1.50x10 <sup>-7</sup><br>1.50x10 <sup>-7</sup><br><b>1.58x10<sup>-7</sup></b><br>1.65x10 <sup>-7</sup><br>1.66x10 <sup>-7</sup><br>1.91x10 <sup>-7</sup><br><b>2.13x10<sup>-7</sup></b><br>2.25x10 <sup>-7</sup><br>2.52x10 <sup>-7</sup><br>2.81x10 <sup>-7</sup><br>3.69x10 <sup>-7</sup><br>4.33x10 <sup>-7</sup><br>9.27x10 <sup>-7</sup><br>9.76x10 <sup>-7</sup><br>1.25x10 <sup>-6</sup><br>1.46x10 <sup>-6</sup> |
| 12                  | TET2                                                                                                                                                                                                                                                             | 4   | 106044468-106428563        | 289                                                                                                                                                                    | 2.22x10 <sup>-6</sup>                                                                                                                                                                                                                                                                                                                                                                                                                                                                                                                                                                                                                                     |
| Chr5:139.5-139.6 Mb | CYSTM1                                                                                                                                                                                                                                                           | 5   | 139554227-139661637        | 214                                                                                                                                                                    | 1.45x10 <sup>-6</sup>                                                                                                                                                                                                                                                                                                                                                                                                                                                                                                                                                                                                                                     |

|                           |                                             |           |                            |                                |                                                                                                        |
|---------------------------|---------------------------------------------|-----------|----------------------------|--------------------------------|--------------------------------------------------------------------------------------------------------|
| <b>13</b>                 | <b>DBN1<br/>GRK6<br/>F12<br/>PRR7</b>       | <b>5</b>  | <b>176848019-176909800</b> | <b>35<br/>45<br/>23<br/>44</b> | <b>6.60x10<sup>-9</sup><br/>1.19x10<sup>-8</sup><br/>1.31x10<sup>-7</sup><br/>2.07x10<sup>-7</sup></b> |
| Chr6:26.5-26.6Mb          | BTN1A1                                      | 6         | 26501449-26510650          | 139                            | 1.74x10 <sup>-6</sup>                                                                                  |
| <b>15</b>                 | <b>FOXO3</b>                                | <b>6</b>  | <b>108856378-109020332</b> | <b>211</b>                     | <b>1.35x10<sup>-12</sup></b>                                                                           |
| <b>17</b>                 | <b>PDE1C</b>                                | <b>7</b>  | <b>32259273-32858489</b>   | <b>1634</b>                    | <b>1.75x10<sup>-9</sup></b>                                                                            |
| Chr7:86.2-86.5 Mb         | GRM3                                        | 7         | 86273230-86494200          | 424                            | 1.13x10 <sup>-6</sup>                                                                                  |
| <b>18</b>                 | <b>EXOC4</b>                                | <b>7</b>  | <b>132950174-133734597</b> | <b>1171</b>                    | <b>9.61x10<sup>-8</sup></b>                                                                            |
| <b>20</b>                 | <b>APBA1</b>                                | <b>9</b>  | <b>72014104-72213075</b>   | <b>365</b>                     | <b>7.88x10<sup>-9</sup></b>                                                                            |
| <b>Chr10:64.9-65.3 Mb</b> | <b>JMJD1C</b>                               | <b>10</b> | <b>64926981-65225722</b>   | <b>525</b>                     | <b>1.99x10<sup>-6</sup></b>                                                                            |
| Chr10:94.0-94.2 Mb        | MARCH5                                      | 10        | 94050920-94113721          | 110                            | 1.55x10 <sup>-7</sup>                                                                                  |
| Chr11:133.7-133.9 Mb      | IGSF9B                                      | 11        | 133778459-133826880        | 170                            | 1.50x10 <sup>-6</sup>                                                                                  |
| Chr11:123.9-124.1 Mb      | OR10D3<br>VWA5A                             | 11        | 123986069-124056952        | 136<br>184                     | 1.92x10 <sup>-6</sup><br>2.24x10 <sup>-6</sup>                                                         |
| Chr11:124.1-124.2 Mb      | OR8D2                                       | 11        | 124189134-124190184        | 113                            | 2.16x10 <sup>-6</sup>                                                                                  |
| <b>Chr12:49.3-49.5 Mb</b> | <b>PRKAG1<br/>KMT2D<br/>DDN<br/>RHEBL1</b>  | <b>12</b> | <b>49388932-49463808</b>   | <b>36<br/>60<br/>30<br/>42</b> | <b>4.33x10<sup>-7</sup><br/>4.43x10<sup>-7</sup><br/>5.76x10<sup>-7</sup><br/>2.48x10<sup>-6</sup></b> |
| <b>Chr12:93.1-93.4 Mb</b> | <b>EEA1<br/>PLEKHG7</b>                     | <b>12</b> | <b>93115281-93323107</b>   | <b>351<br/>155</b>             | <b>5.69x10<sup>-8</sup><br/>1.54x10<sup>-6</sup></b>                                                   |
| Chr12:123.4-123.7 Mb      | PITPNM2                                     | 12        | 123468027-123634562        | 174                            | 2.46x10 <sup>-6</sup>                                                                                  |
| <b>Chr14:69.5-69.7 Mb</b> | <b>DCAF5</b>                                | <b>14</b> | <b>69517598-69619867</b>   | <b>190</b>                     | <b>1.37x10<sup>-6</sup></b>                                                                            |
| <b>22</b>                 | <b>CKB<br/>BAG5</b>                         | <b>14</b> | <b>103833065-104186052</b> | <b>75<br/>73</b>               | <b>2.47x10<sup>-6</sup><br/>2.64x10<sup>-6</sup></b>                                                   |
| <b>Chr15:82.4-82.6 Mb</b> | <b>EFTUD1<br/>FAM154B</b>                   | <b>15</b> | <b>82422571-82577271</b>   | <b>414<br/>154</b>             | <b>4.08x10<sup>-8</sup><br/>4.09x10<sup>-8</sup></b>                                                   |
| Chr16:12.9-13.4 Mb        | SHISA9                                      | 16        | 12995477-13334272          | 952                            | 5.33x10 <sup>-7</sup>                                                                                  |
| <b>23</b>                 | <b>ATXN2L<br/>TUFM<br/>SH2B1<br/>ATP2A1</b> | <b>16</b> | <b>28298418-29008079</b>   | <b>47<br/>57<br/>92<br/>66</b> | <b>2.27x10<sup>-8</sup><br/>7.72x10<sup>-8</sup><br/>1.87x10<sup>-7</sup><br/>5.37x10<sup>-7</sup></b> |
| Chr16:72.0-72.1 Mb        | DHODH                                       | 16        | 72042487-72058954          | 202                            | 9.60x10 <sup>-8</sup>                                                                                  |

|                           |                                                                  |           |                          |                                                      |                                                                                                                                                                                    |
|---------------------------|------------------------------------------------------------------|-----------|--------------------------|------------------------------------------------------|------------------------------------------------------------------------------------------------------------------------------------------------------------------------------------|
| Chr17:34.5-35.0 Mb        | GGNBP2<br>DHRS11<br>MYO19<br>TBC1D3H<br>TBC1D3G                  | 17        | 34581086-34957235        | 85<br>28<br>112<br>4<br>4                            | $7.38 \times 10^{-7}$<br>$8.31 \times 10^{-7}$<br>$1.57 \times 10^{-6}$<br>$2.28 \times 10^{-6}$<br>$2.28 \times 10^{-6}$                                                          |
| Chr18:12.9-13.0 Mb        | SEH1L                                                            | 18        | 12947132-12987535        | 181                                                  | $2.35 \times 10^{-6}$                                                                                                                                                              |
| <b>Chr18:49.8-51.1 Mb</b> | <b>DCC</b>                                                       | <b>18</b> | <b>49866542-51057784</b> | <b>3737</b>                                          | <b><math>5.86 \times 10^{-8}</math></b>                                                                                                                                            |
| Chr19:31.7-31.9 Mb        | TSHZ3                                                            | 19        | 31765851-31840453        | 166                                                  | $3.64 \times 10^{-7}$                                                                                                                                                              |
| <b>24</b>                 | <b>CSE1L</b><br><b>STAU1</b><br><i>ARFGEF2</i><br>PREX1<br>DDX27 | <b>20</b> | <b>47422577-47933479</b> | <b>206</b><br><b>213</b><br><b>364</b><br>658<br>156 | <b><math>1.14 \times 10^{-10}</math></b><br><b><math>5.86 \times 10^{-10}</math></b><br><b><math>7.58 \times 10^{-10}</math></b><br>$8.50 \times 10^{-8}$<br>$4.65 \times 10^{-7}$ |
| Chr22:31.7-31.8 Mb        | LINC01521                                                        | 22        | 31742875-31744670        | 72                                                   | $1.69 \times 10^{-6}$                                                                                                                                                              |
| <b>Chr22:42.3-42.5 Mb</b> | <b>WBP2NL</b><br><b>SEPT3</b><br>FAM109B<br>SMDT1                | <b>22</b> | <b>42372276-42480288</b> | <b>157</b><br><b>143</b><br>50<br>45                 | <b><math>1.78 \times 10^{-7}</math></b><br><b><math>6.95 \times 10^{-7}</math></b><br>$1.56 \times 10^{-6}$<br>$1.78 \times 10^{-6}$                                               |
| <b>25</b>                 | <b>SHANK3</b><br>ACR                                             | <b>22</b> | <b>51083118-51155826</b> | <b>162</b><br>66                                     | <b><math>2.22 \times 10^{-8}</math></b><br>$7.08 \times 10^{-7}$                                                                                                                   |

155

156

157

158

159

160

161

Table 2: Genome-wide significant genes from gene-wise association analyses. Genetic locus is that identified in single-variant analyses, or the genomic region otherwise. P value from competitive test in MAGMA. Loci in bold were significantly associated in Sniekers et al. (2017). Genes in italics have previously been implicated in developmental delay or intellectual disability.

## 162 ***Tissue- and cell-specific gene expression***

163 Tissue-specific enrichment analysis identified an enrichment of genes with  
164 high brain-specific expression associated with intelligence ( $p_{\text{MAGMA}} = 4.43 \times 10^{-9}$ ,  
165  $p_{\text{LDSC}} = 4.23 \times 10^{-6}$ ; Figure 3a, Supplementary Table 3a). Across 10 brain regions in  
166 GTEx<sup>18</sup>, stronger gene associations with intelligence were associated with increased  
167 specificity of gene expression to the frontal cortex ( $p_{\text{MAGMA}} = 0.00305$ ,  $p_{\text{LDSC}} = 2.66 \times$   
168  $10^{-4}$ ; Figure 3b, Supplementary Table 3b).

169 In the KI level 1 (broad cell groups) cell-type specific analyses, both linear  
170 regression (MAGMA)<sup>22</sup> and heritability enrichment-based analyses (LD Score)<sup>23</sup>  
171 supported enrichment of genes with high specificity to pyramidal neurons in the  
172 somatosensory neocortex ( $p_{\text{MAGMA}} = 1.41 \times 10^{-6}$ ,  $p_{\text{LDSC}} = 5.81 \times 10^{-4}$ ) and in the CA1  
173 region of the hippocampus ( $p_{\text{MAGMA}} = 9.08 \times 10^{-5}$ ,  $p_{\text{LDSC}} = 1.12 \times 10^{-3}$ ), as well as to  
174 midbrain embryonic GABAergic neurons ( $p_{\text{MAGMA}} = 9.47 \times 10^{-5}$ ,  $p_{\text{LDSC}} = 1.61 \times 10^{-3}$ ;  
175 Figure 3c, Supplementary Table 3c). Level 2 analyses (narrowly-defined cell types)  
176 suggested significant enrichment of genes with high specificity to type pyramidal  
177 cells of the CA1 region ( $p_{\text{MAGMA}} = 2.16 \times 10^{-4}$ ,  $p_{\text{LDSC}} = 1.19 \times 10^{-4}$ ), although  
178 considerable variability was observed between methods at this level of granularity  
179 (Figure 3d, Supplementary Table 3d).

180 Cell-type specific analyses were repeated conditioning on each enriched cell-  
181 type in turn. When controlling for gene expression in pyramidal neurons of the  
182 somatosensory neocortex, the previously observed enrichment in CA1 pyramidal  
183 cells is lost. In contrast, the patterns of enrichment observed when conditioning on  
184 expression in CA1 pyramidal cells or in midbrain embryonic GABAergic neurons  
185 were consistent with those observed without conditioning (Figure 4).

186

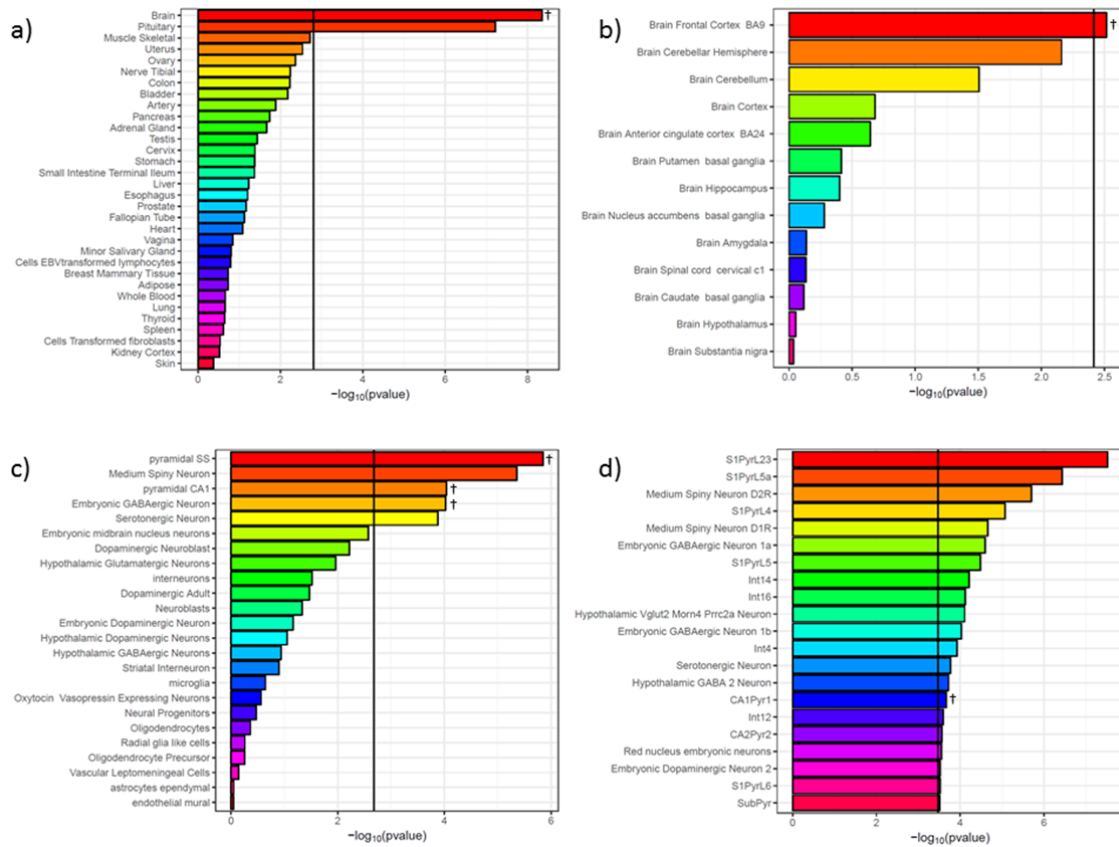

187  
188  
189  
190  
191  
192  
193  
194  
195

Figure 3: Results of tissue- and cell-specific analyses. a) Whole-body analyses; b) Brain tissue analyses; c) KI level 1 cell analyses; d) KI level 2 cell analyses (only those significant in MAGMA competitive analyses after correction for multiple testing shown). Vertical lines are the Bonferroni threshold for each analysis. Results shown are from MAGMA analyses - tissues and cell-types also significant in LDSC analyses are indicated with †. Full results are shown in Supplementary Table 3.

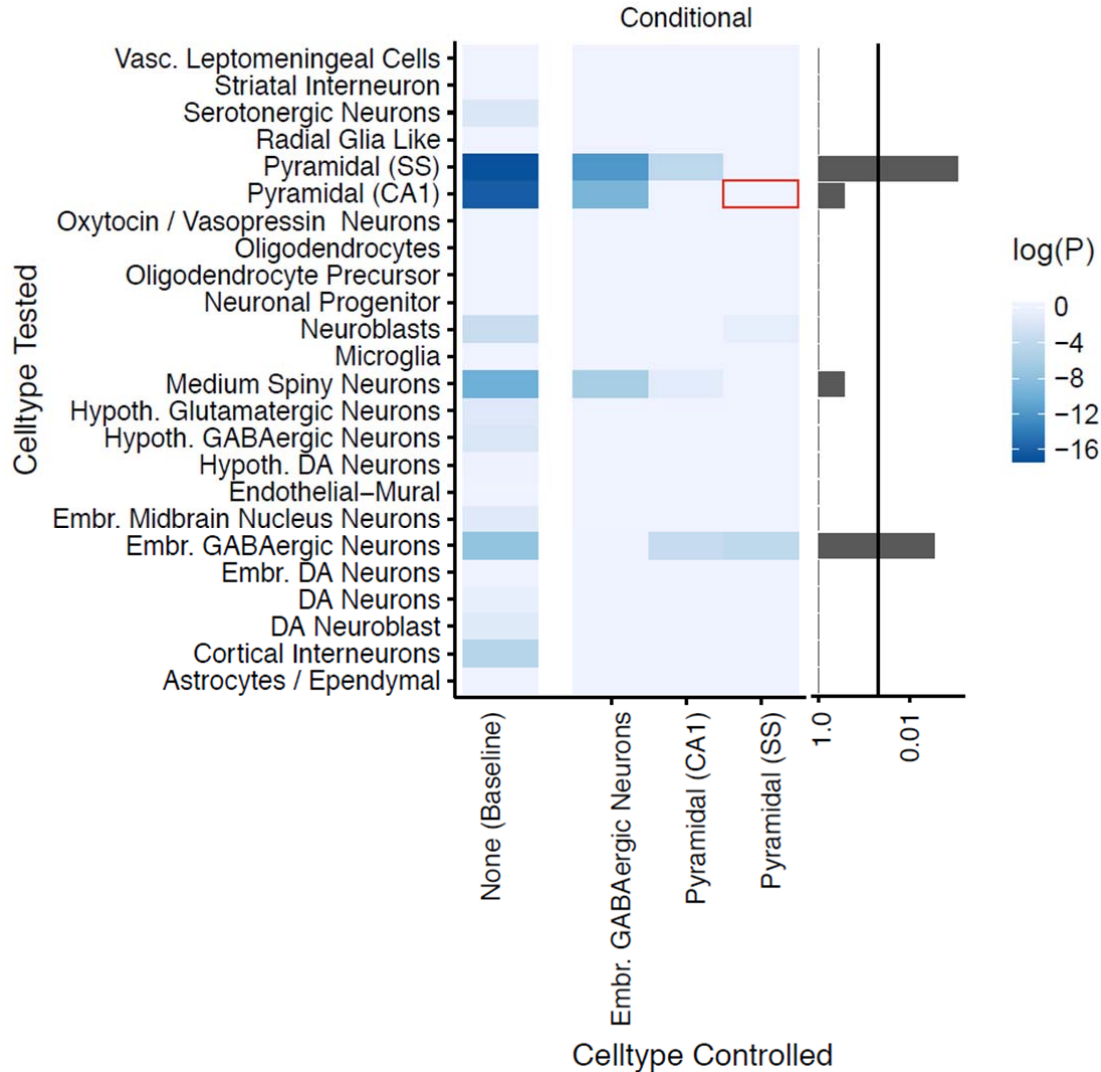

196

197

198

199

200

201

202

203

204

205

206

Figure 4: Conditional cell-type enrichment analysis. X-axis lists target cell-types. Y-axis lists other cell-types. Colors correspond to the enrichment probability of the other cell type after conditioning ( $P$ ). Values of  $\log(P)$  approaching zero indicate no enrichment after conditioning. Barplot on the right shows the minimum value of  $P$  for each cell-type across all conditional analyses (excluding analyses of the target cell-type with itself); the vertical line marks  $p=0.05$ . Red box highlights the loss of significant enrichment in CA1 pyramidal neurons when conditioning on somatosensory (SS) neurons.

207 ***Predicted tissue-specific gene expression***

208           Across the 10 GTEx brain tissues, results from MetaXcan suggested  
209 significant effects on the expression of 16 genes ( $p < 1.60 \times 10^{-6}$ ; Table 3). Eight of  
210 these genes are situated at locus 11 (Chr3, 48.7-50.2 Mb). Genetic variation was  
211 predicted to upregulate 6 genes and downregulate 10 genes, with both single-region  
212 (9 genes) and multiple-region (7 genes) patterns of altered expression implied. Three  
213 genes (*NAGA*, *TUFM* and *GMPPB*) have previously been implicated in ID.

214

215 ***Tissue-specific pathway analysis***

216           Tissue-specific pathway analyses identified 32 nested pathways with  $p \leq$   
217  $5.34 \times 10^{-6}$  (Bonferroni correction for 9,361 effectively independent pathways), of  
218 which 29 contained genes that were significant in the gene-wise analysis  
219 (Supplementary Table 4; Supplementary Figure 2). 7 pathways remained significant  
220 after further correcting for all tissue-specific tests: "self-reported educational  
221 attainment", "modulation of synaptic transmission", "neurodegenerative disease",  
222 "neuron spine", "schizophrenia", "rare genetic neurological disorder", and "potentially  
223 synaptic genes" (Table 4).

224

225

226

| Locus               | Gene         | Tissues                         | Direction | P                      | Genewise? |
|---------------------|--------------|---------------------------------|-----------|------------------------|-----------|
| 11                  | RNF123       | Putamen basal ganglia           | -         | 5.77x10 <sup>-7</sup>  | No        |
|                     |              | Nucleus accumbens basal ganglia | -         | 3.98x10 <sup>-10</sup> |           |
|                     |              | Frontal cortex                  | -         | 1.84x10 <sup>-7</sup>  |           |
|                     |              | Cerebellar Hemisphere           | -         | 6.37x10 <sup>-7</sup>  |           |
| 11                  | NPRL2        | Cortex                          | +         | 1.06x10 <sup>-7</sup>  | No        |
| 11                  | MST1         | Hypothalamus                    | +         | 1.33x10 <sup>-7</sup>  | Yes       |
| 11                  | MST1R        | Cerebellum                      | -         | 2.25x10 <sup>-7</sup>  | Yes       |
|                     |              | Cerebellar Hemisphere           | -         | 8.98x10 <sup>-7</sup>  |           |
| 11                  | RBM6         | Frontal cortex                  | +         | 2.28x10 <sup>-7</sup>  | Yes       |
| 11                  | FAM212A      | Cerebellar Hemisphere           | -         | 4.40x10 <sup>-7</sup>  | Yes       |
| 11                  | AMIGO3       | Cortex                          | -         | 1.31x10 <sup>-6</sup>  | Yes       |
| 11                  | <i>GMPPB</i> | Cortex                          | -         | 1.38x10 <sup>-6</sup>  | Yes       |
| Chr12: 58.3-58.4 Mb | XRCC6BP1     | Nucleus accumbens basal ganglia | +         | 1.15x10 <sup>-6</sup>  | No        |
|                     |              | Hypothalamus                    | +         | 1.50x10 <sup>-6</sup>  |           |
|                     |              | Cortex                          | +         | 9.27x10 <sup>-7</sup>  |           |
|                     |              | Caudate basal ganglia           | +         | 9.33x10 <sup>-7</sup>  |           |
| 15                  | FOXO3        | Nucleus accumbens basal ganglia | -         | 4.93x10 <sup>-10</sup> | Yes       |
| 23                  | <i>TUFM</i>  | Putamen basal ganglia           | -         | 4.89x10 <sup>-7</sup>  | Yes       |
|                     |              | Nucleus accumbens basal ganglia | -         | 1.38x10 <sup>-7</sup>  |           |
| 23                  | NPIP6        | Caudate basal ganglia           | -         | 1.33x10 <sup>-6</sup>  | No        |
| Chr17:34.9-35.0 Mb  | DHRS11       | Putamen basal ganglia           | -         | 3.75x10 <sup>-7</sup>  | No        |
|                     |              | Nucleus accumbens basal ganglia | -         | 1.39x10 <sup>-6</sup>  |           |
|                     |              | Caudate basal ganglia           | -         | 1.09x10 <sup>-6</sup>  |           |
| Chr18:12.9-13.2Mb   | CEP192       | Cortex                          | +         | 9.41x10 <sup>-8</sup>  | No        |
| Chr22:42.4-42.5 Mb  | <i>NAGA</i>  | Putamen basal ganglia           | -         | 1.29x10 <sup>-7</sup>  | No        |
|                     |              | Cerebellum                      | -         | 2.67x10 <sup>-7</sup>  |           |
|                     |              | Cerebellar Hemisphere           | -         | 2.19x10 <sup>-7</sup>  |           |
| Chr22:42.5-42.6 Mb  | CYP2D6       | Hypothalamus                    | +         | 5.70x10 <sup>-7</sup>  | No        |

227

228

229

230

231

232

233

Table 3: Genes predicted to be upregulated (+) or downregulated (-) in specific tissues. Genetic locus is that identified in single-variant analyses, or the genomic region otherwise. Genewise = genome-wide significant in gene-wise analyses.

Genes in italics have previously been implicated in developmental delay or intellectual disability.



| Pathway Name                           | Tissues significant                                                                                                                                                                                                                                                                                                                                                                                                                                  | Significant genes                                                                                                                                                                                                                                                                                           | Min p [Tissue]                                  |
|----------------------------------------|------------------------------------------------------------------------------------------------------------------------------------------------------------------------------------------------------------------------------------------------------------------------------------------------------------------------------------------------------------------------------------------------------------------------------------------------------|-------------------------------------------------------------------------------------------------------------------------------------------------------------------------------------------------------------------------------------------------------------------------------------------------------------|-------------------------------------------------|
| Self Reported Educational Attainment   | Adipose, Artery, Bladder, Brain, Breast Mammary Tissue, Cells Transformed fibroblasts, Cervix, Colon, Fallopian Tube, Liver, Lung, Nerve Tibial, Ovary, Unweighted, Small Intestine Terminal Ileum, Spleen, Uterus, Whole Blood, Amygdala, Anterior cingulate cortex (BA24), Caudate (basal ganglia), Cortex, Frontal Cortex (BA9), Hippocampus, Hypothalamus, Nucleus accumbens (basal ganglia), Putamen (basal ganglia), Spinal cord (cervical c1) | ATXN2L, RNF123, NEGR1, DPP4, BTN1A1, JMJD1C                                                                                                                                                                                                                                                                 | $1.03 \times 10^{-9}$<br>[Frontal Cortex (BA9)] |
| GO:Neuron Spine                        | Artery, Bladder, Cells EBVtransformed lymphocytes, Cervix, Esophagus, Lung, Minor Salivary Gland, Unweighted, Uterus, Vagina, Cerebellar Hemisphere, Cerebellum, Hypothalamus                                                                                                                                                                                                                                                                        | ARFGEF2, SHANK3, EEA1, GRM3                                                                                                                                                                                                                                                                                 | $5.29 \times 10^{-8}$<br>[Cerebellum]           |
| GO:Modulation Of Synaptic Transmission | Artery, Bladder, Cells EBVtransformed lymphocytes, Cervix, Esophagus, Ovary, Thyroid, Uterus, Vagina, Hippocampus                                                                                                                                                                                                                                                                                                                                    | STAU1, PLCL2, DBN1, SHANK3, SHISA9, GRM3, IGSF9B                                                                                                                                                                                                                                                            | $2.77 \times 10^{-8}$<br>[Uterus]               |
| Schizophrenia                          | Brain, Pituitary, Testis, Cortex, Frontal Cortex .BA9.                                                                                                                                                                                                                                                                                                                                                                                               | FOXO3, ARFGEF2, PLCL2, DBN1, APBA1, AMT, THRB, GRK6, FOXO6, SHANK3, GPX1, DCC, EXOC4, F12, CDC42, SHISA9, NEGR1, GRM3, DPP4, IGSF9B                                                                                                                                                                         | $5.57 \times 10^{-8}$<br>[Pituitary]            |
| Rare Genetic Neurological Disorder     | Brain, Nerve Tibial, Pituitary                                                                                                                                                                                                                                                                                                                                                                                                                       | FOXO3, CSE1L, ARFGEF2, PDE1C, DBN1, AMT, THRB, GRK6, ZNF638, FOXO6, RHOA, SHANK3, ATXN2L, DAG1, TRAIIP, BSN, EEA1, GPX1, DCC, TUFM, DHODH, EXOC4, F12, GMPPB, MARCH5, SH2B1, MST1R, DYSF, TSHZ3, COL11A1, PRKAG1, KMT2D, CDC42, ATP2A1, DDN, WNT4, ACR, APEH, GRM3, DPP4, CYSTM1, SEMA3F, JMJD1C, TET2, CKB | $9.09 \times 10^{-8}$<br>[Brain]                |

|                           |        |                                                                                                                                                                                                                                                                                                                                                                       |                                                      |
|---------------------------|--------|-----------------------------------------------------------------------------------------------------------------------------------------------------------------------------------------------------------------------------------------------------------------------------------------------------------------------------------------------------------------------|------------------------------------------------------|
| Neurodegenerative Disease | Testis | <p>FOXO3, CSE1L, <i>ARFGEF2</i>, PDE1C, DBN1, APBA1, <i>THRB</i>, GRK6, ZNF638, <i>SHANK3</i>, ATXN2L, <i>DAG1</i>, BSN, EEA1, GPX1, DCC, <i>TUFM</i>, EXOC4, F12, MARCH5, DYSF, <i>COL11A1</i>, <i>KMT2D</i>, CDC42, ATP2A1, ACR, APEH, NEGR1, GRM3, DPP4, CYSTM1, SEMA3F, JMJD1C, VWA5A, SEH1L</p>                                                                  | <p><math>4.75 \times 10^{-8}</math><br/>[Testis]</p> |
| Potentially Synaptic All  | Brain  | <p>FOXO3, CSE1L, <i>ARFGEF2</i>, PDE1C, PLCL2, DBN1, APBA1, <i>THRB</i>, ZNF638, FOXO6, RHOA, <i>SHANK3</i>, ATXN2L, EFTUD1, BSN, EEA1, GPX1, DCC, <i>TUFM</i>, PREX1, EXOC4, IP6K1, SH2B1, CAMKV, PRR7, ARHGAP15, TSHZ3, RBM6, <i>KMT2D</i>, CDC42, SHISA9, ATP2A1, DDN, SEPT3, NEGR1, GRM3, USP4, DPP4, DCAF5, IGSF9B, JMJD1C, TET2, VWA5A, SEH1L, PITPNM2, CKB</p> | <p><math>1.16 \times 10^{-7}</math><br/>[Brain]</p>  |

235

236

Table 4: Pathways significantly enriched for genes associated with intelligence after correction for all tissue-effective pathways tests. Genes in italics have previously been implicated in developmental delay or intellectual disability.

237

238

239

240 ***Conditional gene set enrichment***

241 Results from tissue-specific and gene-set analyses identified a number of  
242 gene sets associated with intelligence. Of specific interest were synaptic genes  
243 (post-synaptic density proteome list; <sup>24</sup>), RBFOX family binding partners <sup>25</sup>, CELF4  
244 binding partners, and previously reported intellectual disability genes. Additional  
245 analyses were performed to assess whether the association of these gene sets was  
246 independent of the enrichment for gene expression in pyramidal cells of the  
247 somatosensory cortex. Bootstrapped analyses confirmed the association of each  
248 gene set prior to conditional analysis (empirical  $p < 0.05$ ; Supplementary Table 5).  
249 Conditioning on expression in gene expression in pyramidal cells of the  
250 somatosensory cortex, the enrichment for synaptic genes is no longer significant,  
251 indicating that this enrichment is not independent of that observed in the pyramidal  
252 neurons. This effect was not observed for RBFOX or CELF4 targets. Intellectual  
253 disability genes were weakly enriched prior to conditioning, and conditioning had little  
254 effect on enrichment. However, subdividing ID/DD genes into those associated with  
255 severe and those associated with moderate ID/DD indicated that the enrichment  
256 stemmed predominantly from moderate ID/DD genes, and this was not altered by  
257 conditioning on somatosensory pyramidal neuron gene expression (Supplementary  
258 Table 5).

259

260

261 Discussion

262           The overall power of our GWAS meta-analysis was equivalent to a sample  
263 size of ~99,000 individuals due to the inclusion of the extreme trait HiQ sample,  
264 which contributes equivalently to a population cohort of ~21,000 individuals, and is  
265 likely to be enriched for alleles associated with intelligence in the normal range. We  
266 mapped results from our GWAS to tissue and cell-type specific gene expression  
267 data, identifying enrichment of specificity at multiple levels: in the brain, the frontal  
268 cortex, midbrain embryonic GABAergic neurons and pyramidal neurons, especially  
269 those in the somatosensory cortex. A number of genes previously implicated in  
270 intellectual disability or developmental delay are predicted from the GWAS results to  
271 show differential gene expression for normal range IQ in different brain regions, and  
272 are associated with variation in intelligence in the normal range from gene-wise  
273 analyses.

274           RNA sequencing data suggest that genes more strongly associated with  
275 intelligence are enriched for brain-specific expression in general. While the  
276 dominance of brain-specificity over other body tissue specificity is pronounced,  
277 assessing differences within the brain is more difficult. Genes more strongly  
278 associated with intelligence showed higher specificity for frontal cortical expression,  
279 but the differences in cell composition between brain tissues means that cell-type  
280 analyses may be more informative. This can be seen within our results, in that  
281 pyramidal neurons of the somatosensory cortex were significant in the cell-type  
282 specific analysis, but the cortex as a whole is not significant in the GTEx brain-tissue  
283 analysis. This is perhaps due to the fact that the cortex is a highly heterogeneous  
284 mixture of cell-types. Our results suggest expression in pyramidal neurons in one  
285 area of the cortex is relevant in intelligence, but expression in the other cell-types

286 and areas of the cortex may not be <sup>26</sup>. A further caveat to this interpretation is that  
287 the full cellular composition of the cortex (and the brain overall) is not reflected in the  
288 KI mouse superset, and as such our conclusions about wider effects must be  
289 constrained.

290 Genes with higher specificity to pyramidal neurons were enriched for  
291 associations with intelligence. However, the location of the most interesting neuron  
292 population is not yet clear. Observed enrichment in the pyramidal cells of the CA1  
293 region of the hippocampus was lost when accounting for gene expression in  
294 pyramidal cells of the somatosensory cortex. An uncaptured population of pyramidal  
295 neurons (for example, in the frontal cortex) may exist that similarly overlaps in  
296 expression with the somatosensory pyramidal neurons, and accounts for the  
297 enrichment observed in the latter population. While the KI superset is the largest  
298 brain scRNAseq resource to date, it covers a limited set of regions and  
299 developmental stages <sup>16</sup>.

300 Tissue and cell-specific analyses were performed using related but distinct  
301 approaches, namely linear regression of binned specificity and heritability  
302 enrichment analysis of the top 10% of specific genes. Linear regression tended to  
303 give smaller p-values than heritability enrichment analysis (Supplementary Table 3).  
304 While this may be a statistical artefact generated by the differing assumptions of the  
305 methods, this could also result from the pattern of enrichment. For example, a small  
306 set of genes associated with intelligence, all with very high specificity to a given  
307 tissue would result in a lower p-value from heritability enrichment than if the  
308 association with intelligence was spread more broadly across genes with generally  
309 enriched tissue-specificity.

310 The results of analyses in the KI mouse superset for intelligence can be  
311 contrasted with those for schizophrenia<sup>16</sup>. Both phenotypes initially demonstrate  
312 enrichment for the same hippocampal and somatosensory pyramidal neuron  
313 populations. However, conditional analyses in schizophrenia demonstrated  
314 significant differences in the results between schizophrenia and intelligence - the  
315 enrichment observed in the somatosensory cortex in schizophrenia could be fully  
316 explained by that in the hippocampus, while the opposite pattern was observed in  
317 intelligence. Additionally, unlike in schizophrenia, genes implicated in intelligence  
318 also showed specificity in midbrain embryonic cells. Analyses in schizophrenia  
319 implicated more level two cell types than were significant in our analyses. Such  
320 differences may reflect differences in the common-variant contribution to variance in  
321 intelligence and schizophrenia; despite a similar effective sample size to the  
322 schizophrenia GWAS (40,675 cases, 64,643 controls,  $N_{\text{eff}} \sim 100\text{K}$ ), this GWAS  
323 identified only 25 loci compared with the 140 associated with schizophrenia<sup>27</sup>  
324 highlights the potentially more polygenic nature of the observed heritability of  
325 intelligence, which is approximately equal to that of schizophrenia.

326 The KI mouse superset has a number of strengths; it is the largest and  
327 broadest scRNAseq dataset to date, captures extra-nuclear as well as nuclear  
328 transcripts, and was generated using identical methods<sup>16</sup>. However, there are also  
329 limitations to the use of this dataset. One issue is that the expression data used is  
330 derived from mice rather than humans. Gene expression in the brain is conserved  
331 across mammals, such that the principal axes of variation in comparative studies of  
332 gene expression capture inter-tissue, rather than inter-species, variance<sup>28</sup>.  
333 Furthermore, there is a high degree of conservation of gene expression between  
334 mouse and human brains specifically<sup>16,29,30</sup>. Previous analyses using the KI mouse

335 superset have made extensive comparison between mouse and human gene  
336 expression and found high concordance in mapping mouse to human genes <sup>16</sup>.

337 Nevertheless, cell types that are not enriched for genes associated with  
338 intelligence in this study should not be prematurely excluded, as some cell-types are  
339 not present in the dataset and others will have dissimilar functions or have been  
340 exposed to different evolutionary pressures in mouse and in human. Intelligence is a  
341 major characteristic that differentiates humans from other mammals <sup>31</sup>. As such, it  
342 may be the case that genes with higher specificity to regions dissimilar between  
343 humans and mice could be enriched for associations with intelligence, which would  
344 not be captured by this approach.

345 Our results highlight potential insights beyond those gleaned from tissue-  
346 specific expression patterns. Several genes previously implicated in ID/DD were  
347 present in loci associated in the GWAS. Perhaps the most interesting example of this  
348 is *GMPPB* (GDP-Mannose Pyrophosphorylase B), which is in locus 11 of the GWAS  
349 results, and was genome-wide significant in gene-wise analyses. It is a member of  
350 the "rare genetic neurological disorder" gene set (significantly enriched, specifically  
351 in neural tissues), and the expression of *GMPPB* was predicted to be downregulated  
352 in the cortex of individuals with higher intelligence. Rare loss of function mutations in  
353 the *GMPPB* gene have been identified as causal mutations in tens of individuals with  
354 muscular dystrophies and myasthenias, many of which present with mild to severe  
355 ID <sup>32-36</sup>. The product of this gene is important for the glycosylation of  $\alpha$ -DG (alpha-  
356 dystroglycan - the dystroglycan gene *DAG* is also present in locus 11 and is a  
357 significantly associated gene in this analysis; <sup>32</sup>). Glycosylation is required for the  
358 interaction of  $\alpha$ -DG with extracellular ligands, with a variety of consequences  
359 including the organization of axon guidance <sup>37</sup>. Our results, in the context of the

360 medical genetic literature, tentatively suggest the effects on axon guidance by  
361 glycosylated a-DG may be an area worthy of further exploration to understand the  
362 biology of intelligence.

363         However, the observed overall overlap of all ID/DD genes with loci from the  
364 GWAS does not differ from that expected by chance. This lack of significant  
365 enrichment is partly reflected in the pathway analysis - there are several overlapping  
366 gene sets designed to capture ID/DD genes. Of these, only "rare genetic  
367 neurological disorder" was significantly enriched following correction. Further insight  
368 is obtained from conditional gene-set analyses - although the overall "intellectual  
369 disability" gene set is only nominally associated with intelligence, stratifying this gene  
370 set demonstrates considerable enrichment of mild intellectual disability genes,  
371 independent of gene expression in somatosensory pyramidal neurons. The presence  
372 of genes causative of ID/DD in loci associated with intelligence in the normal range,  
373 and the enrichment of specific pathways and gene sets derived from the ID/DD  
374 literature, may indicate shared biology between ID/DD and normal intelligence.  
375 However, the lack of broad enrichment of all such genes suggests that there may  
376 also be distinct pathways contributing to normal intelligence that are not commonly  
377 affected in ID/DD. ID/DD is not a single condition, but a group of disorders with  
378 differing etiologies - our results are still consistent with a two-group model of ID/DD  
379 etiology<sup>38-40</sup>.

380         The meta-analysis results presented herein extend previous findings<sup>4</sup>. The  
381 results are largely consistent with those previously reported, which is unsurprising.  
382 More genes were identified in our gene-wise analysis due to an analytical decision to  
383 extend the boundaries by which each gene is defined 35kb upstream and 10kb  
384 downstream of the coding region<sup>41,42</sup>. Defining genes using this boundary (as



385 opposed to no boundary extension) captures additional transcriptional elements -  
386 these may be specific to the target gene, but may also capture elements with more  
387 distal regulatory effects.

388 Deriving testable biological hypotheses from the statistical associations of  
389 GWAS results is one of the central challenges for the immediate future of complex  
390 genetics<sup>3,15</sup>. The provision of high-quality reference datasets encompassing genetic  
391 information from variation to translation, and the integration of genomic data to such  
392 reference data is invaluable to this aim<sup>16,18</sup>. We have demonstrated that some  
393 insights into the biology of intelligence can be derived from GWAS, and have  
394 suggested potential avenues for further exploration. Our results could indicate that  
395 intelligence represents optimal pyramidal neuron functioning. Cognitive tests are  
396 highly correlated with general intelligence (*g*), which may depend on pyramidal  
397 neuron function<sup>7</sup>.

398 Understanding how biology underlies variation in intelligence is an active area  
399 of research that is beginning to yield results. Unifying these new genetic results with  
400 data from multiple approaches, can increase the power of each approach, has the  
401 potential to yield greater understanding of the biology of intelligence, which in turn  
402 could inform the study of many health-related phenotypes with which intelligence is  
403 correlated.

404 Online Methods

405

406 ***Cohort descriptions***

407

408 *Sniekers intelligence GWAS*<sup>4</sup>

409 The cohort analyzed in Sniekers et al. (2017) was drawn from 7 cohorts,  
410 primarily consisting of data from the UK Biobank pilot genotyping release (N =  
411 54,119) and the Childhood Intelligence Consortium (N = 12,441) as well as seven  
412 additional cohorts (N = 11,748). The phenotype for analysis was Spearman's  $g$ , or a  
413 primary measure of fluid intelligence that correlates highly with  $g$ <sup>4,43</sup>. Summary  
414 statistics from this analysis are available at  
415 [https://ctg.cncr.nl/software/summary\\_statistics](https://ctg.cncr.nl/software/summary_statistics). Full details on cohort characteristics,  
416 genotyping and analysis are supplied in the Supplementary Material.

417

418 *HiQ high-intelligence GWAS*

419 The Duke University Talent Identification Program (TIP) cohort has been  
420 described previously<sup>17</sup>. In brief, TIP is a non-profit organization that recruits and  
421 nurtures academically gifted children of extremely high intelligence (top 3%) from the  
422 US population. For genomic study, 1,247 participants from the top 1% of TIP (top  
423 0.03% of population) were selected as a high-intelligence cohort (HiQ). IQ was  
424 inferred from performance on the Scholastic Assessment Test (SAT) or American  
425 College Test (ACT) taken at age 12 rather than the usual age of 18 years. A  
426 population comparison cohort (N = 8,185) was obtained from the The University of  
427 Michigan Health and Retirement Study (HRS). Participants were assumed to be

428 drawn from the normal distribution of intelligence. Full details on genotyping and  
429 analysis are supplied in the Supplementary Material.

430

### 431 ***Meta-analysis***

432 Summary statistics from Sniekers et al. (2017) and HiQ were meta-analyzed  
433 using METAL<sup>4,44</sup>. To account for the increased discovery power afforded by the  
434 extreme-sampling method used in TIP, analyses were weighted by their respective  
435 non-centrality parameters (NCP), estimated using the Genetic Power Calculator<sup>45–</sup>  
436<sup>47</sup>. Specifically, NCPs were estimated assuming a causal variant of 20% frequency,  
437 capturing 0.1% of variance in each phenotype, assuming HiQ controls are drawn  
438 from the normal distribution (+/- 2 SD from the mean) and HiQ cases are sampled  
439 from 4 SD above the mean, consistent with IQ > 160 in 99% of the cohort<sup>17</sup>. The  
440 NCP of the Sniekers cohort (N = 78,308) was 78.4, while the NCP of the HiQ cohort  
441 was 21.6, suggesting the HiQ cohort contributes equivalently to a population cohort  
442 of ~21,000 individuals. Only variants present in both cohorts were retained for  
443 analysis.

444 Following association analysis, genome-wide significant loci were defined via  
445 clumping in PLINK2<sup>48</sup>. Index variants ( $p < 5 \times 10^{-4}$ ) were merged into loci if in linkage  
446 disequilibrium ( $r^2 > 0.1$  within 500kb) with a variant with a lower p-value. Loci within  
447 50kb of each other were merged. Manhattan and QQ plots were generated using  
448 FUMA<sup>49</sup>. Annotation of genomic results with: data from the EBI GWAS catalog;  
449 OMIM; GENCODE genes; genes previously implicated in autism and in intellectual  
450 disability; copy-number variants previously implicated in psychiatric disorders; and  
451 mouse knockout phenotypes was performed with RegionAnnotator version 1.63  
452 (<https://github.com/ivankosmos/RegionAnnotator>).

453

454 ***Heritability and partitioned heritability***

455       The heritability of intelligence accounted for by common variants was  
456 estimated using LD Score, limited to the HapMap3 variants and pre-computed LD  
457 scores provided with the package <sup>19</sup>. Heritability was then partitioned across the 53  
458 genomic annotations provided with the package <sup>23</sup>, with the addition of 5 annotations:  
459 open chromatin regions (ATAC and ATAC Bryois extend 500, which increases the  
460 window around the region by 500 bases in both directions), the intersection between  
461 ATAC and conserved regions of the genome (ATAC-conserved) and regions present  
462 in the Neanderthal genome (Neanderthal and Neanderthal extend 500; <sup>21,50</sup>. Regions  
463 of open chromatin were identified in prefrontal cortical tissue from 135 schizophrenic  
464 individuals and 137 controls using ATAC sequencing, which identifies stretches of  
465 DNA free of nucleosomes and other DNA-binding proteins <sup>21,51</sup>.

466

467 ***Gene-wise analyses***

468       Results from the meta-analysis were filtered to retain only single nucleotide  
469 variants (SNPs) present in the European superpopulation of 1000 Genomes Phase 3  
470 <sup>52</sup>. SNPs were annotated to a gene using MAGMA v1.06, assigning SNPs to genes if  
471 they lay between 35kb upstream and 10kb downstream of the gene location (as  
472 supplied on the MAGMA website, build 37; <sup>22</sup>. Gene-wise p-values were obtained  
473 from MAGMA as the aggregate of the mean and smallest p-value across all SNPs  
474 annotated to the gene. MAGMA accounts for possible confounders such as gene  
475 size, gene density, linkage disequilibrium and minor allele count. The threshold for  
476 genome-wide significance was defined as  $p = 2.65 \times 10^{-6}$ , the Bonferroni correction  
477 for the 18,839 genes tested. Genes passing genome-wide significance were defined

478 as coming from the same locus if their locations were within 50kb of each other, or if  
479 they lay within clumped loci from the single variant analysis. Significant genes were  
480 cross-referenced to the intellectual disability (ID) gene list provided with  
481 RegionAnnotator. The significance of the observed overlap was quantified as a  
482 hypergeometric test in R<sup>53</sup>, using as background 1,366 ID/DD genes in 18,839  
483 autosomal genes.

484

### 485 ***Tissue- and cell-specific gene expression***

486 Tissue-specific and cell-type specific proportions of gene expression were  
487 calculated following the method described in detail in<sup>16</sup>). Tissue expression data was  
488 drawn from the GTEx Consortium<sup>18</sup>, and brain cell-type expression data was drawn  
489 from scRNAseq data from mouse brain<sup>16</sup>. For each gene, the value for each tissue  
490 (or cell-type) was calculated by dividing the mean Unique Molecular Identifier (UMI)  
491 counts for the given tissue by the summed mean UMI counts across all tissues<sup>16</sup>.

492 Associations between gene-wise p-values from the meta-analysis and tissue-  
493 specific (cell-type specific) gene expression were calculated using two methods,  
494 implemented in MAGMA<sup>22</sup> and in LD Score<sup>19</sup>. In MAGMA, genes were grouped into  
495 40 equal bins by specificity of expression, and bin membership was regressed on  
496 gene-wise association with intelligence in the meta-analysis (For these analyses,  
497 gene-wise association was defined as the mean p-value across all SNPs assigned to  
498 the gene.) In LD Score, the 10% of genes with the highest specificity within each  
499 tissue were used as a gene set for partitioned heritability analysis. Results were  
500 considered significant if the association p-values were smaller than the relevant  
501 Bonferroni threshold for both methods.

502 Conditional cell-specific analyses were performed as a secondary analysis to  
503 test whether each enriched cell-type observed was independent of all others. Full  
504 details of the method implemented are provided in Skene et al., 2017. In brief, for  
505 each enriched cell-type in turn (the target cell-type), z-scores from gene-wise  
506 association analyses with intelligence were randomly resampled without  
507 replacement. The mean z-score within each expression-specificity decile of the  
508 target cell-type was held constant, but the mean z-score of each specificity decile of  
509 other cell types was randomized. Empirical p-values were derived for each of the  
510 other cell-types, and this procedure was repeated 10,000 times. Expression in each  
511 of the other cell-types is considered to be associated with intelligence independently  
512 of expression in the target cell type if the observed p-value is lower than the 500th  
513 empirical p-value (i.e. 95% of the empirical distribution; <sup>16</sup>).

514

### 515 ***Predicted tissue-specific gene expression***

516 Results from the variant-level meta-analysis were used to predict gene  
517 expression using MetaXcan and genomic and transcriptomic reference data from the  
518 brain regions assayed in the GTEx project <sup>18,54</sup>. Associations between predicted  
519 gene expression levels and intelligence were calculated. Significance was set at  
520  $1.60 \times 10^{-6}$ , the Bonferroni correction for the 31303 gene-tissue pairs tested <sup>54</sup>.  
521 Significant genes were cross-referenced to the intellectual disability gene list  
522 provided with RegionAnnotator.

523

### 524 ***Pathway analysis***

525 A pathway matrix **P** was generated with elements  $P_{g,p} = 1$  if gene  $g$  was in  
526 pathway  $p$  and  $P_{g,p} = 0$  otherwise. The elements in the matrix were multiplied by

527 binned gene expression weights obtained from GTEx data (as in the foregoing  
528 section on tissue-specific expression) for 13 brain regions and 32 tissues, generating  
529 45 weighted gene/pathway matrices. Only genes with expression data were taken  
530 into account. Association between these tissue-weighted pathways and gene-wise  
531 associations with intelligence was computed using MAGMA. 13,564 pathways were  
532 drawn from OpenTargets (downloaded January 2017; <sup>55</sup>), GO ontologies, canonical  
533 pathways drawn from MSigSB v5.2 C2 and C5 datasets <sup>56</sup>, and biological pathways  
534 related to psychiatric disorders found in various scientific publications (a link to each  
535 pathway source is provided in Supplementary Table 4). The pathways assessed by  
536 this approach are related to each other in a complex fashion; GO pathways are  
537 hierarchical and MSigDB and OpenTargets pathways capture related gene sets.  
538 Accordingly, in order to control for multiple testing, the effective number of pathways  
539 tested was established by computing the number of principal components  
540 accounting for 99.5% of explained variance in the pathway similarity matrix, obtained  
541 by computing the Tanimoto similarity between pathways. This results in a Bonferroni-  
542 corrected threshold of  $p = 5.34 \times 10^{-6}$  for 9,361 effectively independent tests for each  
543 matrix. A more stringent threshold was applied secondarily, taking into account all  
544 tissue-specific pathway matrices for a total for 9,361 x 46 tests and threshold  $p =$   
545  $1.16 \times 10^{-7}$ .

546

#### 547 ***Conditional gene set enrichment***

548 Gene sets of interest were drawn from the results of pathway analyses.  
549 Specifically, the human postsynaptic density proteome gene set <sup>24</sup> was used to  
550 capture the effects of synaptic and neuronal pathways. Gene sets of RBFOX and  
551 CELF4 targets were included as they showed enrichment that appears to be driven

552 by brain-specificity, and have been previously implicated in other brain-related traits  
553 <sup>16,25,57</sup>. ID/DD gene sets were tested as they are of specific interest to the study of  
554 intelligence. To assess whether the enrichment of these gene sets is independent of  
555 gene expression in somatosensory pyramidal neurons, conditional analyses were  
556 performed following the method described above for conditional cell-type analyses,  
557 modified for the use of gene sets <sup>16</sup>.

558 ***Data availability***

559 Summary statistics from the GWAS meta-analysis will be made available at  
560 [link available upon publication].

561



562 Acknowledgements

563

564 We gratefully acknowledge the contribution of all of the researchers and participants  
565 involved in the collection and analysis of the data included. This study includes data  
566 from Sniekers et al., 2017, which made use of the UK Biobank resource under  
567 application number 16406 (as previously acknowledged).

568

569 Analysis in this paper represents independent research funded by the National  
570 Institute for Health Research (NIHR) Biomedical Research Centre at South London  
571 and Maudsley NHS Foundation Trust and King's College London. The views  
572 expressed are those of the authors and not necessarily those of the NHS, the NIHR  
573 or the Department of Health. Analyses were performed using high performance  
574 computing facilities funded with capital equipment grants from the GSTT Charity  
575 (TR130505) and Maudsley Charity (980).

576

577 Analysis from Sniekers et al., 2017 was funded by the Netherlands Organization for  
578 Scientific Research (NWO VICI 453-14-005), and carried out on the Genetic Cluster  
579 Computer, which is financed by the Netherlands Scientific Organization (NWO:480-  
580 05-003), by VU University, Amsterdam, the Netherlands, and by the Dutch Brain  
581 Foundation and is hosted by the Dutch National Computing and Networking Services  
582 SurfSARA. PRJ is supported by the 'Stichting Vrienden van Sophia' (grant nr: 14-27)  
583 awarded to DP.

584

585 Research on the HiQ cohort was supported by a European Research Council  
586 Advanced Investigator award (295366) to RP. Collecting DNA from the highest-

587 scoring TIP individuals was supported by an award from the John Templeton  
588 Foundation (13575) to RP.

589

590 Summary statistics from this analysis have been made available at [link available  
591 upon publication].

592

593 Author contributions

594

595 GB, DP and PFS conceived the study. JRIC, JB, HAG, PRJ, JS and NS performed  
596 statistical analyses. RP, ABM, SL, GC and JH acquired data. JRIC and GB wrote the  
597 manuscript. All authors reviewed the manuscript.

598

599

600

601

602

603

604

605 References

- 606 1. Okbay, A. *et al.* Genome-wide association study identifies 74 loci associated  
607 with educational attainment. *Nature* **533**, 539–542 (2016).
- 608 2. Lo, M.-T. *et al.* Genome-wide analyses for personality traits identify six genomic  
609 loci and show correlations with psychiatric disorders. *Nat. Genet.* (2016).  
610 doi:10.1038/ng.3736
- 611 3. Sullivan, P. F. *et al.* Psychiatric Genomics: An Update and an Agenda. *bioRxiv*  
612 115600 (2017). doi:10.1101/115600
- 613 4. Sniekers, S. *et al.* Genome-wide association meta-analysis of 78,308 individuals  
614 identifies new loci and genes influencing human intelligence. *Nat. Genet.* (2017).  
615 doi:10.1038/ng.3869
- 616 5. Davies, G. *et al.* Genome-wide association study of cognitive functions and  
617 educational attainment in UK Biobank (N=112 151). *Mol. Psychiatry* **21**, 758–  
618 767 (2016).
- 619 6. Benyamin, B. *et al.* Childhood intelligence is heritable, highly polygenic and  
620 associated with FBNP1L. *Mol. Psychiatry* **19**, 253–258 (2013).
- 621 7. Deary, I. J. Intelligence. *Annu. Rev. Psychol.* **63**, 453–482 (2012).
- 622 8. Wray, N. R. Allele frequencies and the  $r^2$  measure of linkage disequilibrium:  
623 impact on design and interpretation of association studies. *Twin Res. Hum.*  
624 *Genet.* **8**, 87–94 (2005).
- 625 9. Carlson, C. S. *et al.* Selecting a maximally informative set of single-nucleotide  
626 polymorphisms for association analyses using linkage disequilibrium. *Am. J.*  
627 *Hum. Genet.* **74**, 106–120 (2004).
- 628 10. Hormozdiari, F. *et al.* Widespread Allelic Heterogeneity in Complex Traits. *Am.*  
629 *J. Hum. Genet.* **100**, 789–802 (2017).

- 630 11. Zhu, Z. *et al.* Integration of summary data from GWAS and eQTL studies  
631 predicts complex trait gene targets. *Nat. Genet.* **48**, 481–487 (2016).
- 632 12. Boyle, E. A., Li, Y. I. & Pritchard, J. K. An Expanded View of Complex Traits:  
633 From Polygenic to Omnigenic. *Cell* **169**, 1177–1186 (2017).
- 634 13. Shi, H., Kichaev, G. & Pasaniuc, B. Contrasting the Genetic Architecture of 30  
635 Complex Traits from Summary Association Data. *Am. J. Hum. Genet.* **99**, 139–  
636 153 (2016).
- 637 14. Loh, P.-R. *et al.* Contrasting genetic architectures of schizophrenia and other  
638 complex diseases using fast variance-components analysis. *Nat. Genet.* **47**,  
639 1385–1392 (2015).
- 640 15. Breen, G. *et al.* Translating genome-wide association findings into new  
641 therapeutics for psychiatry. *Nat. Neurosci.* **19**, 1392–1396 (2016).
- 642 16. Skene, N. G. *et al.* Genetic Identification Of Brain Cell Types Underlying  
643 Schizophrenia. *bioRxiv* 145466 (2017). doi:10.1101/145466
- 644 17. Zabaneh, D. *et al.* A genome-wide association study for extremely high  
645 intelligence. *Mol. Psychiatry* (2017). doi:10.1038/mp.2017.121
- 646 18. Consortium, G. TEx. Human genomics. The Genotype-Tissue Expression  
647 (GTEx) pilot analysis: multitissue gene regulation in humans. *Science* **348**, 648–  
648 660 (2015).
- 649 19. Bulik-Sullivan, B. K. *et al.* LD Score regression distinguishes confounding from  
650 polygenicity in genome-wide association studies. *Nat. Genet.* **47**, 291–295  
651 (2015).
- 652 20. Hill, W. D. *et al.* Molecular genetic aetiology of general cognitive function is  
653 enriched in evolutionarily conserved regions. *Transl. Psychiatry* **6**, e980 (2016).
- 654 21. Bryois, J. *et al.* Evaluation Of Chromatin Accessibility In Prefrontal Cortex Of

- 655 Schizophrenia Cases And Controls. *bioRxiv* 141986 (2017). doi:10.1101/141986
- 656 22. de Leeuw, C. A., Mooij, J. M., Heskes, T. & Posthuma, D. MAGMA: generalized  
657 gene-set analysis of GWAS data. *PLoS Comput. Biol.* **11**, e1004219 (2015).
- 658 23. Finucane, H. K. *et al.* Partitioning heritability by functional annotation using  
659 genome-wide association summary statistics. *Nat. Genet.* **47**, 1228–1235  
660 (2015).
- 661 24. Bayés, A. *et al.* Characterization of the proteome, diseases and evolution of the  
662 human postsynaptic density. *Nat. Neurosci.* **14**, 19–21 (2011).
- 663 25. Lee, J. A. *et al.* Cytoplasmic Rbfox1 Regulates the Expression of Synaptic and  
664 Autism-Related Genes. *Neuron* **89**, 113–128 (2016).
- 665 26. Zeisel, A. *et al.* Brain structure. Cell types in the mouse cortex and hippocampus  
666 revealed by single-cell RNA-seq. *Science* **347**, 1138–1142 (2015).
- 667 27. Pardiñas, A. F. *et al.* Common schizophrenia alleles are enriched in mutation-  
668 intolerant genes and maintained by background selection. *bioRxiv* 068593  
669 (2016). doi:10.1101/068593
- 670 28. Brawand, D. *et al.* The evolution of gene expression levels in mammalian  
671 organs. *Nature* **478**, 343–348 (2011).
- 672 29. La Manno, G. *et al.* Molecular Diversity of Midbrain Development in Mouse,  
673 Human, and Stem Cells. *Cell* **167**, 566–580.e19 (2016).
- 674 30. Zeng, H. *et al.* Large-scale cellular-resolution gene profiling in human neocortex  
675 reveals species-specific molecular signatures. *Cell* **149**, 483–496 (2012).
- 676 31. Flinn, M. V., Geary, D. C. & Ward, C. V. Ecological dominance, social  
677 competition, and coalitionary arms races. *Evol. Hum. Behav.* **26**, 10–46 (2005).
- 678 32. Carss, K. J. *et al.* Mutations in GDP-mannose pyrophosphorylase B cause  
679 congenital and limb-girdle muscular dystrophies associated with

- 680 hypoglycosylation of  $\alpha$ -dystroglycan. *Am. J. Hum. Genet.* **93**, 29–41 (2013).
- 681 33. Jensen, B. S. *et al.* GMPPB-Associated Dystroglycanopathy: Emerging  
682 Common Variants with Phenotype Correlation. *Hum. Mutat.* **36**, 1159–1163  
683 (2015).
- 684 34. Rodríguez Cruz, P. M. *et al.* Clinical features of the myasthenic syndrome  
685 arising from mutations in GMPPB. *J. Neurol. Neurosurg. Psychiatry* **87**, 802–809  
686 (2016).
- 687 35. Belaya, K. *et al.* Mutations in GMPPB cause congenital myasthenic syndrome  
688 and bridge myasthenic disorders with dystroglycanopathies. *Brain* **138**, 2493–  
689 2504 (2015).
- 690 36. Cabrera-Serrano, M. *et al.* Expanding the phenotype of GMPPB mutations.  
691 *Brain* **138**, 836–844 (2015).
- 692 37. Wright, K. M. *et al.* Dystroglycan organizes axon guidance cue localization and  
693 axonal pathfinding. *Neuron* **76**, 931–944 (2012).
- 694 38. Roberts, J. A. The genetics of mental deficiency. *Eugen. Rev.* **44**, 71–83 (1952).
- 695 39. McGue, M. & Gottesman, I. I. Classical and Molecular Genetic Research on  
696 General Cognitive Ability. *Hastings Cent. Rep.* **45**, S25–31 (2015).
- 697 40. Vissers, L. E. L. M., Gilissen, C. & Veltman, J. A. Genetic studies in intellectual  
698 disability and related disorders. *Nat. Rev. Genet.* **17**, 9–18 (2016).
- 699 41. Network and Pathway Analysis Subgroup of Psychiatric Genomics Consortium.  
700 Psychiatric genome-wide association study analyses implicate neuronal,  
701 immune and histone pathways. *Nat. Neurosci.* **18**, 199–209 (2015).
- 702 42. Maston, G. A., Evans, S. K. & Green, M. R. Transcriptional regulatory elements  
703 in the human genome. *Annu. Rev. Genomics Hum. Genet.* **7**, 29–59 (2006).
- 704 43. Deary, I. J., Penke, L. & Johnson, W. The neuroscience of human intelligence

- 705 differences. *Nat. Rev. Neurosci.* **11**, 201–211 (2010).
- 706 44. Willer, C. J., Li, Y. & Abecasis, G. R. METAL: fast and efficient meta-analysis of  
707 genomewide association scans. *Bioinformatics* **26**, 2190–2191 (2010).
- 708 45. Purcell, S., Cherny, S. S. & Sham, P. C. Genetic Power Calculator: design of  
709 linkage and association genetic mapping studies of complex traits.  
710 *Bioinformatics* **19**, 149–150 (2003).
- 711 46. Peloso, G. M. *et al.* Phenotypic extremes in rare variant study designs. *Eur. J.*  
712 *Hum. Genet.* **24**, 924–930 (2016).
- 713 47. de Bakker, P. I. W. *et al.* Practical aspects of imputation-driven meta-analysis of  
714 genome-wide association studies. *Hum. Mol. Genet.* **17**, R122–R128 (2008).
- 715 48. Chang, C. C. *et al.* Second-generation PLINK: rising to the challenge of larger  
716 and richer datasets. *Gigascience* **4**, 7 (2015).
- 717 49. Watanabe, K., Taskesen, E., van Bochoven, A. & Posthuma, D. FUMA:  
718 Functional mapping and annotation of genetic associations. *bioRxiv* 110023  
719 (2017). doi:10.1101/110023
- 720 50. Vernot, B. *et al.* Excavating Neandertal and Denisovan DNA from the genomes  
721 of Melanesian individuals. *Science* **352**, 235–239 (2016).
- 722 51. Buenrostro, J. D., Giresi, P. G., Zaba, L. C., Chang, H. Y. & Greenleaf, W. J.  
723 Transposition of native chromatin for fast and sensitive epigenomic profiling of  
724 open chromatin, DNA-binding proteins and nucleosome position. *Nat. Methods*  
725 **10**, 1213–1218 (2013).
- 726 52. Sudmant, P. H. *et al.* An integrated map of structural variation in 2,504 human  
727 genomes. *Nature* **526**, 75–81 (2015).
- 728 53. Team, R. C. R: A language and environment for statistical computing [Internet].  
729 Vienna, Austria: R Foundation for Statistical Computing; 2013. *Document freely*

- 730            *available on the internet at: <http://www.r-project.org> (2015).*
- 731    54. Barbeira, A. *et al.* MetaXcan: Summary Statistics Based Gene-Level Association  
732            Method Infers Accurate PrediXcan Results. *bioRxiv* 045260 (2016).  
733            doi:10.1101/045260
- 734    55. Koscielny, G. *et al.* Open Targets: a platform for therapeutic target identification  
735            and validation. *Nucleic Acids Res.* (2016). doi:10.1093/nar/gkw1055
- 736    56. Liberzon, A. *et al.* The Molecular Signatures Database (MSigDB) hallmark gene  
737            set collection. *Cell Syst* **1**, 417–425 (2015).
- 738    57. Wagon, J. L. *et al.* CELF4 regulates translation and local abundance of a vast  
739            set of mRNAs, including genes associated with regulation of synaptic function.  
740            *PLoS Genet.* **8**, e1003067 (2012).
